# Supplementary material
Source: MDPI journal article supplement (https://www.mdpi.com/2308-3417/8/3/57)
Supplement: s1 [file s1]

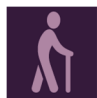

Supplemental Figure S1. Flow-chart of data collection.

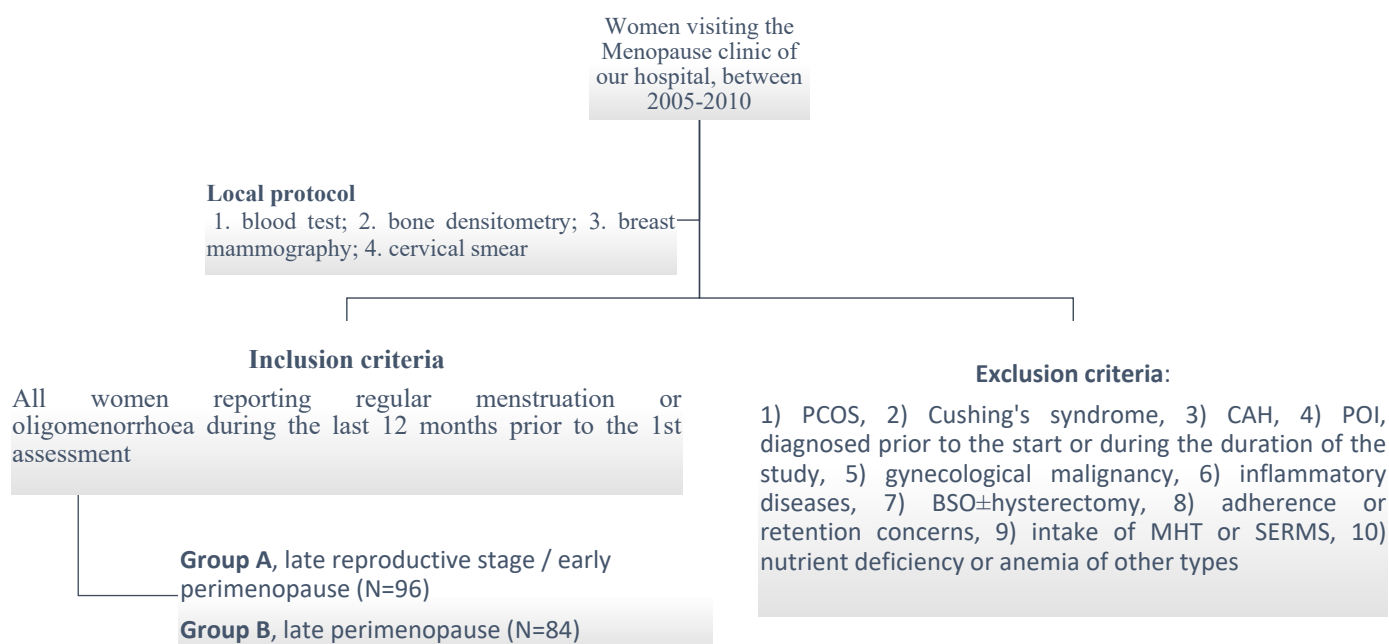

Note: PCOS = polycystic ovary syndrome; CAH = congenital adrenal hyperplasia; POI = premature ovarian insufficiency; BSO = bilateral salpingoophorectomy; MHT = menopause hormone therapy; SERMS = selective estrogen receptor modulators
